# Supplementary material for: Development of a clinical prediction model for sensitivity to combination therapy of Bcl-2 inhibitors and hypomethylating agents in elderly/unfit patients with acute myeloid leukemia
Source: Research Square preprint supplement (doi:10.21203/rs.3.rs-5949741/v1), 2025-02-19
Supplement: Supplementary file 1 [file 0f3788fb81f02b66d11c7ec3.docx]

Table S3. Characteristics of 209 AML patients.

| Baseline characteristics | Value |
| --- | --- |
| Sex [n (%)] |  |
| Male | 122 (58.4) |
| Female | 87 (41.6) |
| Age［year, M (P25,P75)］ | 66 (57, 71) |
| ECOG score [n (%)] |  |
| 0～1 | 83 (39.7) |
| 2～3 | 126 (60.3) |
| Combination of other tumors [n (%)] |  |
| Yes | 21 (10.0) |
| No | 188 (90.0) |
| FAB type [n (%)] |  |
| M1/M2 | 124 (59.3) |
| M4/M5 | 68 (32.5) |
| M0/M6/M7 | 17 (8.1) |
| AML status [n (%)] |  |
| Newly diagnosed | 151 (72.2) |
| Refractory/Relapsed | 58 (27.8) |
| AMLtype [n (%)] |  |
| De novo AML | 142 (67.9) |
| Secondary-AML | 67 (32.1) |
| Median WBC count [(×109/L), M (P25, P75)] | 4.77 (2.02, 12.53) |
| Median neutrophil count [(×109/L), M (P25, P75)] | 1.43 (0.50, 3.75) |
| Median hemoglobin concentration [(×109/L), M (P25, P75)] | 76 (62, 97) |
| Median platelet count[(×109/L), M (P25, P75)] | 53 (26.5, 103) |
| Bone marrow blasts [%, M (P25, P75)] | 36.0 (24, 65.3) |
| Chromosome karyotype (According to ELN-2022) [n (%)] |  |
| Normal karyotype | 121 (57.9) |
| Hyperdiploid/polyploid karyotype | 30 (14.4) |
| Adverse karyotype | 58 (27.8) |
| Gene mutations (Top six) |  |
| *ASXL1* | 57 (27.3) |
| *DNMT3A* | 55 (26.3) |
| *K/NRAS* | 53 (25.4) |
| *RUNX1* | 46 (22.0) |
| *TET2* | 43 (20.6) |
| *FLT3* | 43 (20.6) |
| ELN-2022 risk stratification [n (%)] |  |
| Low risk | 16 (7.7) |
| Moderate risk | 51 (24.4) |
| High risk | 142 (67.9) |
| Prior_HMAs [n (%)] |  |

Table S3. Cont.

| Yes | 55 (26.3) |
| --- | --- |
| No | 154 (73.7) |
| Cycles of Ven-HMAs [%, M (P25, P75)] | 2 (1, 8) |
| Types of hypomethylating agents [n (%)] |  |
| Azacitidine | 166 (79.4) |
| Decitabine | 43 (20.6) |

Abbreviations: ECOG, Eastern Cooperative Oncology Group; FAB, French-American-British; WBC: White blood cell; ELN-2022, European Leukemia Network-2022; Prior_HMAs, Prior hypomethylating agents exposure; Ven-HMAs: Venetoclax in Combination with hypomethylating agents.
