# Supplementary material for: Development of a clinical prediction model for sensitivity to combination therapy of Bcl-2 inhibitors and hypomethylating agents in elderly/unfit patients with acute myeloid leukemia
Source: Research Square preprint supplement (doi:10.21203/rs.3.rs-5949741/v1), 2025-02-19
Supplement: Supplementary file 2 [file 24f644c09e8b57b1f24b2109.docx]

Table S4. Univariate Logistic Regression Analysis of Ven-HMAs Treatment for Predicting CR/CRi (sensitive) in AML Patients.

| Variables | CR/CRi [N (%) ] | Odds ratio (95% CI) | *P* value |
| --- | --- | --- | --- |
| Sex |  | | |
| Female* | 41 (47.1) |  |  |
| Male | 55 (45.1) | 0.921 (0.530–1.599) | 0.770 |
| Age | - | 1.002 (0.982–1.023) | 0.832 |
| ECOG score |  | | |
| ＜ 2* | 36 (43.4) |  |  |
| ≥ 2 | 60 (47.6) | 1.187 (0.680–2.072) | 0.547 |
| FAB classification |  | | |
| M1/M2* | 68 (54.8) |  |  |
| M4/M5 | 22 (32.4) | 0.394 (0.212–0.731) | **0.003** |
| M0/M6/M7 | 6 (35.3) | 0.449 (0.156–1.291) | 0.137 |
| S-AML |  | | |
| No* | 78 (54.9) |  |  |
| Yes | 18 (26.9) | 0.301 (0.160–0.568) | **< 0.001** |
| R/R AML |  | | |
| No* | 87 (57.6) |  |  |
| Yes | 9 (15.5) | 0.135 (0.062–0.295) | **< 0.001** |
| Combination of other tumors |  | | |
| No* | 88 (46.8) |  |  |
| Yes | 8 (38.1) | 0.699 (0.277–1.766) | 0.449 |
| Prior-HMAs |  | | |
| No* | 88 (57.1) |  |  |
| Yes | 8 (14.5) | 0.128 (0.057–0.288) | **< 0.001** |
| Hypomethylating agents |  | | |
| Decitabine * | 18 (41.9) |  |  |
| Azacitidine | 78 (47.0) | 1.231 (0.625–2.426) | 0.548 |
| Chromosome karyotype (According to ELN-2022) |  | | |
| Normal karyotype* | 64 (66.7) |  |  |
| Hyperdiploid/polyploid karyotype | 21 (21.9) | 2.078 (0.881–4.904) | 0.095 |
| Adverse karyotype | 11 (11.5) | 0.208 (0.099–0.440) | **< 0.001** |
| *MLL* fusion genes |  | | |
| Negative* | 92 (46.7) |  |  |
| Positive | 4 (33.3) | 0.571 (0.166–1.957) | 0.372 |
| Gene mutations | | | |
| *ASXL1* |  | | |
| Negative* | 77 (50.7) |  |  |
| Positive | 19 (33.3) | 0.487 (0.258–0.920) | **0.027** |
| *DNMA3A* |  | | |
| Negative* | 68 (44.2) |  |  |
| Positive | 28 (50.9) | 1.312 (0.708–2.431) | 0.389 |
| *TET2* |  | | |
| Negative* | 77 (46.4) |  |  |

Table S4 (continued)

| Variables | CR/CRi[N (%) ] | Odds ratio (95% CI) | P value |
| --- | --- | --- | --- |
| Positive | 19 (44.2) | 0.915 (0.466–1.970) | 0.796 |
| *GATA2* |  | | |
| Negative* | 86 (46.0) |  |  |
| Positive | 10 (45.5) | 0.979 (0.403–2.376) | 0.962 |
| *FLT3* |  | | |
| Negative* | 83 (50.0) |  |  |
| Positive | 13 (30.2) | 0.433 (0.211–0.889) | **0.023** |
| *IDH* |  | | |
| Negative* | 65 (38.7) |  |  |
| Positive | 31 (75.6) | 4.912 (2.258–10.689) | **< 0.001** |
| *TP53* |  | | |
| Negative* | 89 (50.9) |  |  |
| Positive | 7 (20.6) | 0.251 (0.104–0.606) | **0.002** |
| *NPM1* |  | | |
| Negative* | 70 (39.8) |  |  |
| Positive | 26 (78.8) | 5.624 (2.316–13.662) | **< 0.001** |
| *N/KRAS* |  | | |
| Negative* | 78 (50.0) |  |  |
| Positive | 18 (34.0) | 0.514 (0.269–0.985) | **0.045** |
| *RUNX1* |  | | |
| Negative* | 76 (46.6) |  |  |
| Positive | 20 (43.5) | 0.881 (0.455–1.702) | 0.705 |
| *SF3B1* |  | | |
| Negative* | 91 (47.9) |  |  |
| Positive | 5 (26.3) | 0.389 (0.135–1.122) | 0.080 |
| *KIT* |  | | |
| Negative* | 87 (45.3) |  |  |
| Positive | 9 (52.9) | 1.358 (0.503–3.668) | 0.546 |
| *SRSF2* |  | | |
| Negative* | 82 (44.6) |  |  |
| Positive | 14 (56.0) | 1.583 (0.682–3.673) | 0.285 |
| *BCOR* |  | | |
| Negative* | 86 (47.5) |  |  |
| Positive | 10 (35.7) | 0.614 (0.269–1.402) | 0.247 |
| *CEBPA* |  | | |
| Negative* | 81 (42.6) |  |  |
| Positive | 15 (78.9) | 5.046 (1.614–15.775) | **0.005** |
| *EZH2* |  | | |
| Negative* | 85 (44.5) |  |  |
| Positive | 11 (61.1) | 1.960 (0.728–5.272) | 0.183 |
| *U2AF1* |  | | |
| Negative* | 89 (47.1) |  |  |
| Positive | 7 (35.0) | 0.605 (0.231–1.584) | 0.306 |
| *STAG2* |  | | |

Table 2 (continued)

| Variables | CR/CRi[N (%) ] | Odds ratio (95% CI) | P value |
| --- | --- | --- | --- |
| Negative* | 87 (46.3) | Negative* | 87 (46.3) |
| Positive | 9 (42.9) | 0.871 (0.350–2.164) | 0.766 |
| *ZRSR2* |  | | |
| Negative* | 91 (45.7) |  |  |
| Positive | 5 (50.0) | 1.187 (0.333–4.229) | 0.792 |
| *ETV6* |  | | |
| Negative* | 88 (46.6) |  |  |
| Positive | 8 (40.0) | 0.765 (0.299–1.957) | 0.576 |
| *PHF6* |  | | |
| Negative* | 90 (45.7) |  |  |
| Positive | 6 (50.0) | 1.189 (0.371–3.815) | 0.771 |
| *NF1* |  | | |
| Negative* | 92 (46.7) |  |  |
| Positive | 4 (33.3) | 0.571 (0.166–1.957) | 0.372 |
| *PTPN11* |  | | |
| Negative* | 92 (47.7) |  |  |
| Positive | 3 (21.4) | 0.299 (0.081–1.105) | 0.070 |
| *JAK2* |  | | |
| Negative* | 92 (46.7) |  |  |
| Positive | 4 (33.3) | 0.571 (0.166–1.957) | 0.372 |
| *DDX41* |  | | |
| Negative* | 91 (45.0) |  |  |
| Positive | 5 (71.4) | 3.049 (0.578–16.088) | 0.189 |

Abbreviations: *, reference; ECOG, Eastern Cooperative Oncology Group; FAB, French-American-British; S-AML, Secondary-AML; R/R AML, Refractory/Relapsed AML; ELN-2022, European Leukemia Network-2022.
