# Supplementary material for: Development of a clinical prediction model for sensitivity to combination therapy of Bcl-2 inhibitors and hypomethylating agents in elderly/unfit patients with acute myeloid leukemia
Source: Research Square preprint supplement (doi:10.21203/rs.3.rs-5949741/v1), 2025-02-19
Supplement: Supplementary file 3 [file 2e6e0b43f75673129580a5b3.docx]

Supplemental table S2. Criteria for the inclusion and exclusion of study participants.

| **Inclusion Criteria:** |
| --- |
| Adult patients were diagnosed with AML based on the 2016 revision to the World Health Organization classification of myeloid neoplasms and acute leukemia, utilizing bone marrow morphology, immunophenotyping, cytogenetics, and molecular biology. |
| Treatment with Ven-HMAs was administered for a minimum duration of one complete course. |
| The patient's medical records included comprehensive laboratory data, particularly molecular biology and cytogenetics. |
| **Exclusion criteria:** |
| Patients with acute promyelocytic leukemia and chronic myeloid leukemia in accelerated phase or blast crisis. |
| Patients with other active malignant tumors or those with mental health disorders. |
| Patients who received Ven-HMAs as consolidation therapy following complete remission of AML. |
| Patients who received treatments with medications other than Ven and HMAs. |
| Pregnant and lactating individuals. |

Abbreviations: Ven, Venetoclax; HMAs, Hypomethylating agents.
