# Supplementary material for: Development of a clinical prediction model for sensitivity to combination therapy of Bcl-2 inhibitors and hypomethylating agents in elderly/unfit patients with acute myeloid leukemia
Source: Research Square preprint supplement (doi:10.21203/rs.3.rs-5949741/v1), 2025-02-19
Supplement: Supplementary file 4 [file f26676f8e9d6c8f57fad3c73.docx]

Supplemental table S1. Gene mutations identified through next-generation sequencing techniques.

| Gene mutations | | | | | | |
| --- | --- | --- | --- | --- | --- | --- |
| *SAMD9L* | *ZBTB7A* | *MBD4* | *FLT3* | *DHX15* | *U2AF1* | *TP53* |
| *TET2* | *TERT* | *TERC* | *SMC1A* | *SH2B3* | *SF3B1* | *SF1* |
| *SETD2* | *PTPN11* | *PTEN* | *PPM1D* | *ASXL2* | *PHF6* | *MECOM* |
| *KRAS* | *KMT2A* | *KIT* | *GATA2* | *EZH2* | *ETV6* | *CSF3R* |
| *CEBPA* | *CCND2* | *CBL* | *CALR* | *STAT3* | *STAG2* | *SRSF2* |
| *SRP72* | *SMC3* | *SETBP1* | *SAMD9* | *RUNX1* | *RAD21* | *JAK3* |
| *NRAS* | *NPM1* | *NF1* | *MPL* | *ZRSR2* | *JAK2* | *IKZF1* |
| *IDH2* | *IDH1* | *GSKIP* | *EP300* | *DNMT3A* | *DDX41* | *CUX1* |
| *WT1* | *BCORL1* | *BCOR* | *ATG2B* | *ASXL1* | *ANKRD26* | *-* |
